# Supplementary material for: Selective vancomycin detection using optical fibre long period gratings functionalised with molecularly imprinted polymer nanoparticles
Source: Royal Society of Chemistry journal article supplement (doi:10.1039/c3an02126b), 2014-01-01
Supplement: c3an02126b1.pdf [file c3an02126b1.pdf]

## Supplementary Information Available

### Selective vancomycin detection using long period grating fibres functionalised with molecularly imprinted polymer nanoparticles

Sergiy Korposh<sup>1</sup>, Iva Chianella<sup>2</sup>, Antonio Guerreiro<sup>2</sup>, Sarah Caygill<sup>2</sup>, Sergey Piletsky<sup>2</sup>,  
Stephen W. James<sup>1</sup>, Ralph P. Tatam<sup>1</sup>

<sup>1</sup>Department of Engineering Photonics, School of Engineering, Cranfield University,  
Cranfield, Bedfordshire, MK43 0AL, UK

<sup>2</sup>Cranfield Health, Cranfield University, Cranfield, Bedfordshire, MK43 0AL, UK

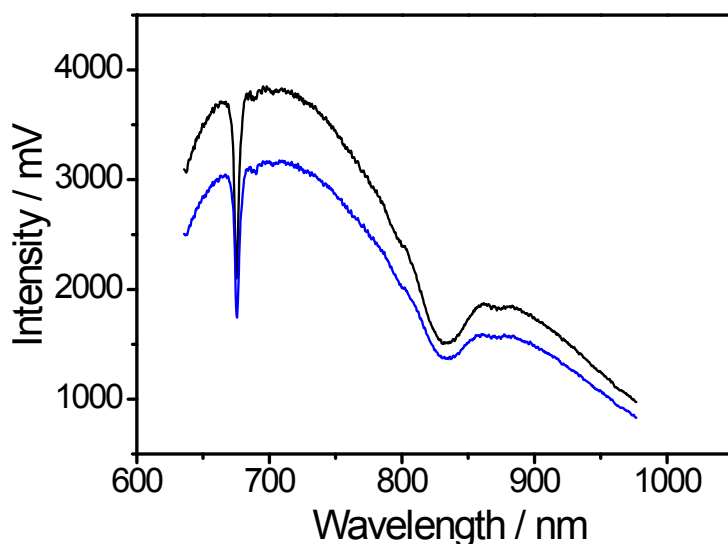

**Figure S1.** TS of the nanoMIPs-coated LPG modified with the measured in air in two different days. The difference in intensity is due to fluctuations in the light source.

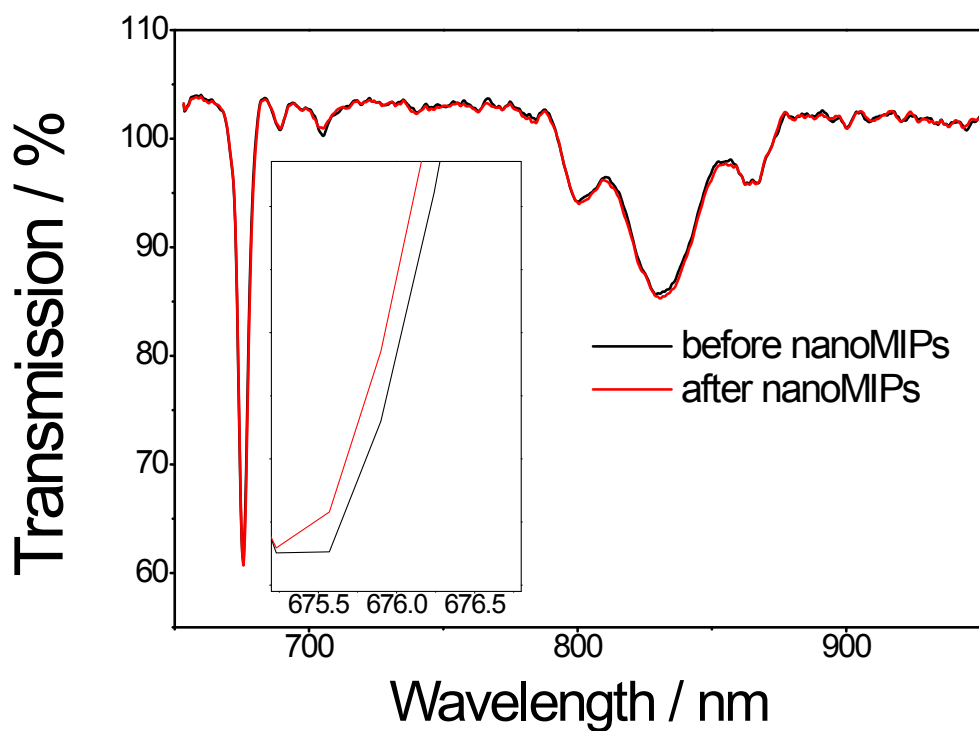

**Figure S2.** TS of the LPG measured in air: black line, before nanoMIPs deposition; and red line, after nanoMIPs deposition.

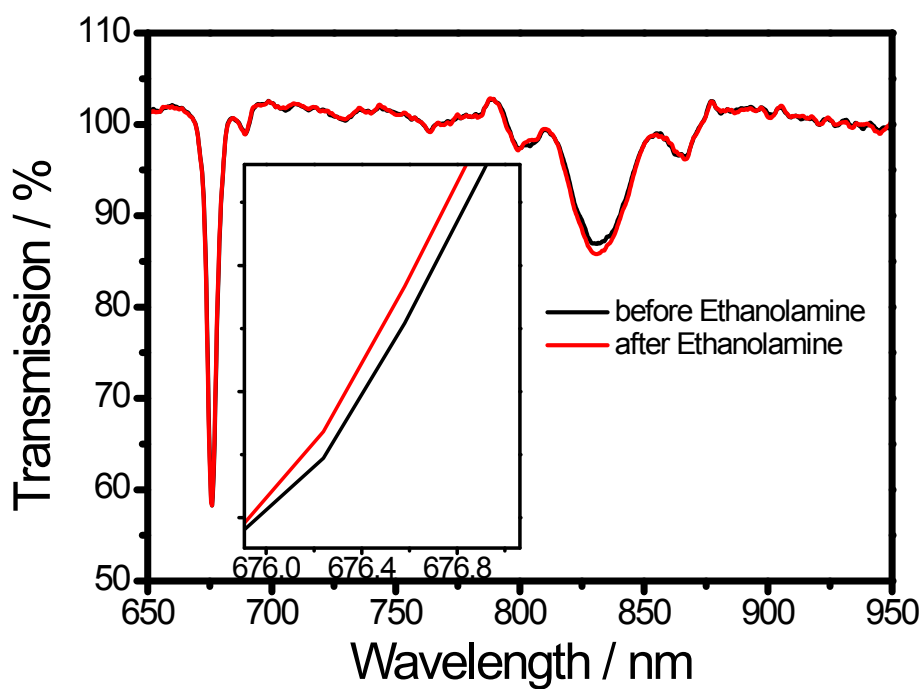

**Figure S3.** TS of the nanoMIPs-coated LPG measured in air: black line, before blocking; and red line, after blocking using Ethanolamine.

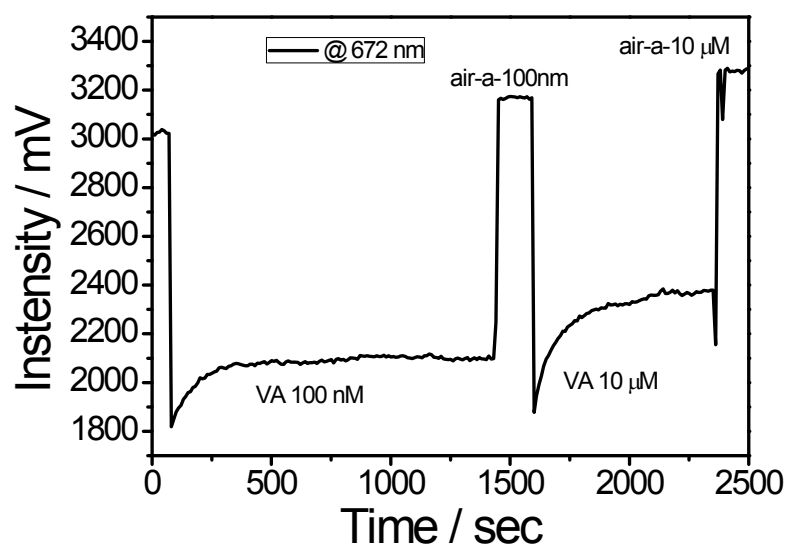

**Figure S4.** Dynamic signal change, measured at 672 nm, during the immersion of the nano-MIPs-coated LPG into VA 100 nM and 10 μM.

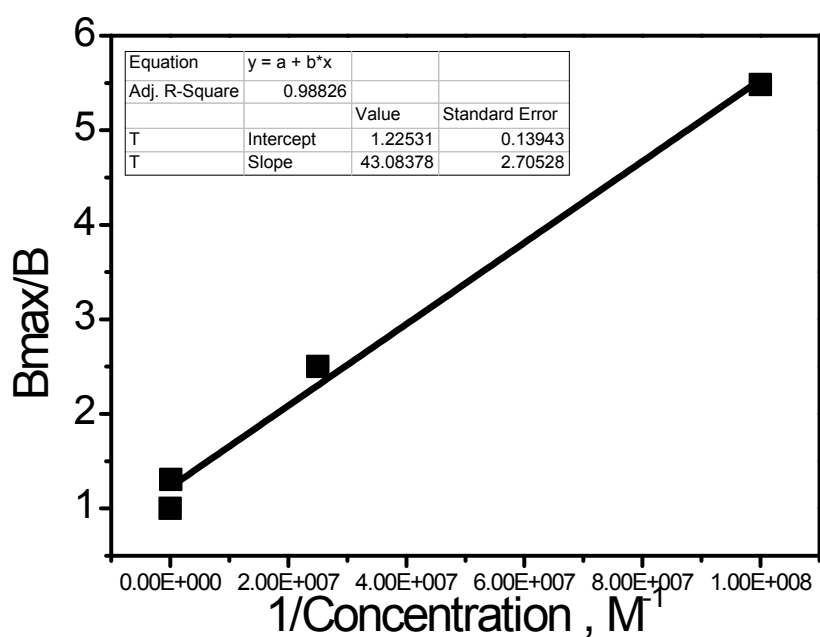

**Figure S5.** The data obtained were plotted as they were with the saturation equation for specific binding ( $B = B_{max}c / K_d + c$ , where  $c$  is the concentration of VA and  $B$  the fraction of sites bound). Data were linearized with a variation of the Scatchard-Rosenthal plot, using the equation,  $B_{max}/B = K_d / c + 1$ .

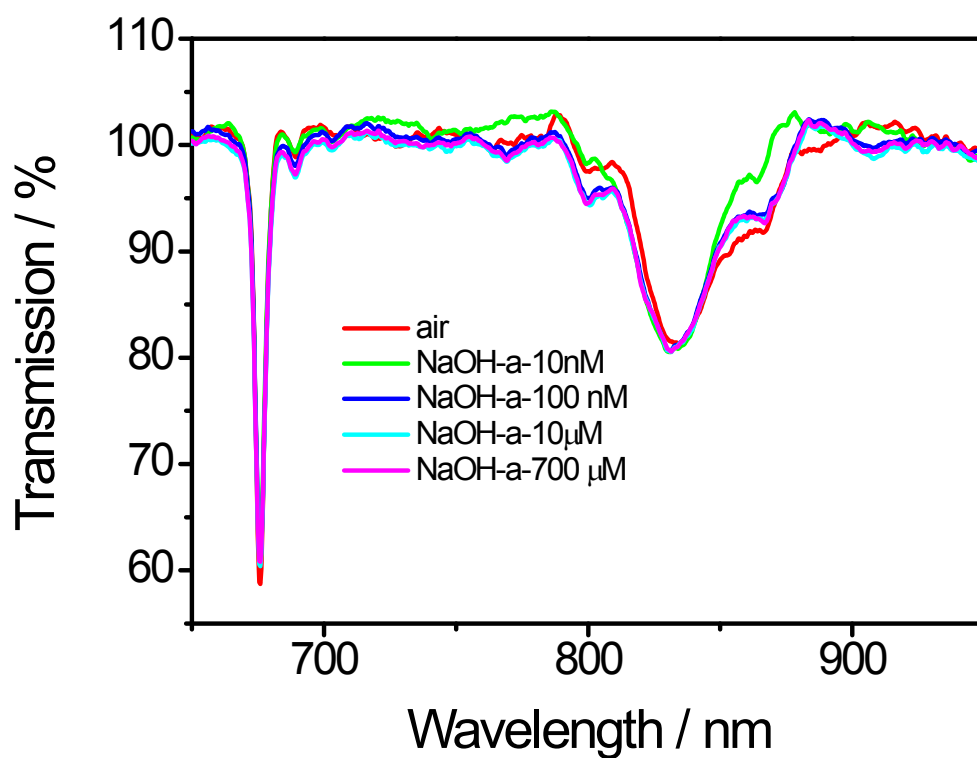

**Figure S6.** TS of the nanoMIPs-coated LPG, measured in air after exposure to NaOH (0.1 M) for signal recovery.
